# Supplementary material
Source: PubMed Central journal article supplement (PMC2895089)
Supplement: 1001294107_pnas.1001294107_SI.pdf [file 1001294107_pnas.1001294107_SI.pdf]

# Supporting Information

Duan et al. 10.1073/pnas.1001294107

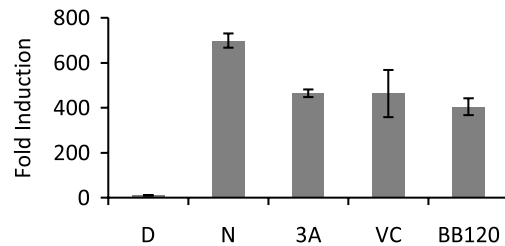

**Fig. S1.** Autoinducer 2 (AI-2) expression in various strains. AI-2 was measured by bioassay in the strains of bacteria used in this study. D, *Escherichia coli* DH5 $\alpha$ ; N, Nissle; 3A, Nissle-cqsA; VC, *Vibrio cholerae* El Tor C6706; BB120, *V. cholerae* BB120. Average values are shown. Error bars represent 1 SD of at least triplicate measurements.

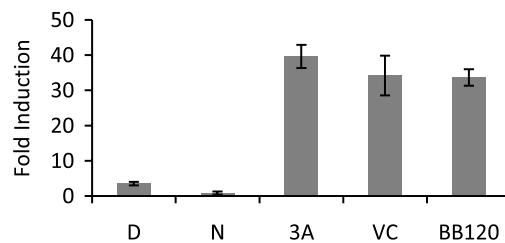

**Fig. S2.** Cholera autoinducer 1 (CAI-1) expression in various strains. CAI-1 was measured by bioassay in the several strains of bacteria used in this study. D, *E. coli* DH5 $\alpha$ ; N, Nissle; 3A, Nissle-cqsA; VC, *V. cholerae* El Tor C6706; BB120, *V. cholerae* BB120. Average values are shown. Error bars represent 1 SD of at least triplicate measurements.

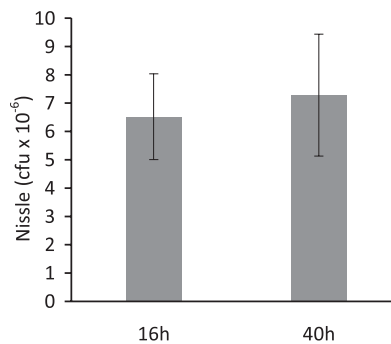

**Fig. S3.** Survivability of *E. coli* Nissle-cqsA in the infant mouse. Following 8 h pretreatment with  $10^9$  cells of Nissle-cqsA and subsequent challenge with  $10^7$  cells of *V. cholerae*, infant mouse intestines were homogenized at 16 and 40 h after challenge. Plate counts were taken and the average cfu/mL are shown. Error bars represent 1SD of at least triplicate measurements.
